# Supplementary material for: Relative Cleanability and Sanitization of Blueberry Mechanical Harvester Surfaces
Source: MDPI journal article supplement (doi:10.3390/horticulturae8111017), 2022-11-01
Supplement: s1 [file s1]

Archive with 1 entries (1 files):
- horticulturae-1952371-supplementary.pdf
